# Supplementary material for: Combined effect of Cu0and oxygen vacancies in Cu-based zeolites enables highly efficient photo-Fenton-like performance for water purification
Source: Royal Society of Chemistry journal article supplement (doi:10.1039/d4en00181h), 2024-01-01
Supplement: d4en00181h1.pdf [file d4en00181h1.pdf]

## Supplementary Information

### **Combined effect of Cu<sup>0</sup> and oxygen vacancy in Cu-based zeolite enables highly efficient photo-Fenton-like performance for water purification**

Wei Zhang,<sup>a</sup> Lan Wang<sup>\*a</sup>, Chen Hou<sup>a</sup>, Zhiqiang Zhu<sup>a</sup>, Eric Lichtfouse<sup>\*b</sup>, Christos Trapalis<sup>c</sup>, and Chuanyi Wang<sup>a</sup>

<sup>a</sup> *School of Environmental Science and Engineering, Shaanxi University of Science and Technology, Xi'an 710021, PR China*

<sup>b</sup> *State Key Laboratory of Multiphase Flow in Power Engineering, Xi'an Jiaotong University, Xi'an 710000, PR China*

<sup>c</sup> *Institute of Nanoscience and Nanotechnology, NCSR "Demokritos", Agia Paraskevi 15341, Greece*

\* Corresponding author.

E-mail addresses: wanglan@sust.edu.cn; eric.lichtfouse@icloud.com

## 1. Texts

### Text S1. Materials.

Sodium aluminate ( $\text{Al}_2\text{O}_3\cdot\text{Na}_2\text{O}$ , 98%), Cetrimonium bromide (CTAB, 99%), Sodium hydroxide (NaOH, 98%), Hexamethyleneimine (HMI, 98%), Tetraethylenepentamine (TEPA, 98%), Sodium thiosulfate ( $\text{Na}_2\text{S}_2\text{O}_3$ , 99%) and Sodium carbonate ( $\text{Na}_2\text{CO}_3$ , 99.8%) were purchased from Aladdin Co., Ltd.. LUDOX AS-40 colloidal silica (40 wt%), Copper (II) sulfate pentahydrate ( $\text{CuSO}_4\cdot 5\text{H}_2\text{O}$ , 99%), benzoquinone (BQ, 99%), L-Histidine (99%), and tert-Butanol (TBA, 99%) were purchased from Merck Co., Ltd.. Phenol (99%), 2,4-Dichlorophenol, 4-chlorophenol (Sigma-Aldrich Co., Ltd.). Hydrogen peroxide, Sulfuric acid (Sinopharm Chemical Reagent Co., Ltd.). Silver nitrate (Tianjin Tiangan Chemical Technology Development Co., Ltd.). All reagents were not purified. Deionized water was prepared by pure water meter and was used throughout the experiment.

### Text S2. Characterization.

XRD patterns was recorded from  $3^\circ$  to  $80^\circ$  with nickel-filtered Cu  $K\alpha$  radiation ( $\lambda = 1.54 \text{ \AA}$  Rigaku, Smart Lab 9kW). Operating conditions: voltage is 45 kV, scanning rate is  $10^\circ/\text{min}$ . TEM was carried out using FEI Talos F200x Microscope, which operating voltage is 200kv. EDS elemental analysis was conducted using Bruker X-Flash SDD 5010. XPS was performed on Thermo SCIENTIFIC K-Alpha spectrometer (Al Kalph source). The specific surface areas were measured by a surface area analyzer (ASAP2460, Micromeritics, USA) with the Brunauer-Emmett-Teller (BET) method, and the pore size distribution was calculated using BJH calculations method. DRS spectroscopy measurement was recorded on a spectrophotometer (Agilent-Cary 5000, USA) from 200 nm to 1200 nm. FTIR spectra were recorded on a Bruker Vertex70 ( $4000\text{--}400 \text{ cm}^{-1}$ ). EIS was measure on CHI 660E (Chenhua Co., Ltd., China). The copper leaching during the reaction was measured by an ICP-AES (Thermo Scientific, ICAP 6300 Duo) instrument.

### Text S3. Analytic methods.

The degradation was monitored via high performance liquid chromatograph (Ultimate 3000, Thermo Fisher Scientific) with a DAD-300 detector, C18 Hypersil GOLD column at column chamber temperature of  $35^\circ\text{C}$ . The test conditions are as follows: phenol (60%  $\text{H}_2\text{O}$ , 40% methanol, flow rate:

1 mL/min, UV: 283 nm). 4-CP (30% H<sub>2</sub>O, 70% methanol, flow rate: 1 mL/min, UV: 224 nm). 2,4-DCP (70% acetonitrile, 30% H<sub>2</sub>O, UV: 286 nm). DCF (35% acetic acid aqueous solution (0.1%), 65% acetonitrile, UV: 274 nm). MB and RhB were detected by ultraviolet spectrophotometer.

In addition, EPR was used to detect the involved reaction ROS, 5,5-Dimethyl-1-pyrroline n-oxide (DMPO) was dispersed in different air-saturated methanol and aqueous dispersions. A 300 W Xe lamp ( $\lambda > 400$  nm) was used as a visible-light source. In the absence of H<sub>2</sub>O<sub>2</sub>, a total of 100  $\mu$ L of DMPO (176.75 mM) was added into 100  $\mu$ L of the prepared degradation solution (water for  $\bullet$ OH, methyl alcohol for  $\bullet$ O<sub>2</sub><sup>-</sup>, 0.2 g/L catalyst, 10 mM H<sub>2</sub>O<sub>2</sub>, pH 4). Then, the mixed solution was held for 5 min under light. The solution was sucked out by a quartz capillary tube with an inner diameter of 1 mm, and the spectrum was recorded by placing the capillary tube in the EPR cavity. For comparison, H<sub>2</sub>O<sub>2</sub> (10 mM) was added into solution before light irradiation to detect the different signals, and other conditions keep constant. The preparation of 2,2,6,6-tetramethyl-4-oxo-piperidine (4-oxo-TEMP) solution is the same as DMPO. 20 mg sample was placed into the sample tube and then into the ESR cavity to detect oxygen vacancy.

TOC of initial and irradiated samples were measured on Elementar TOC analyzer. For EIS test, the ITO glass coating with catalyst was used as a working electrode, and using Pt sheet and Ag/AgCl served as the counter and the reference electrode, respectively. The electrolyte solution: 0.1 M Na<sub>2</sub>SO<sub>4</sub>.

#### **Text S4. DFT calculations**

Gaussian09, D01 software package was used to DFT calculations<sup>1</sup>. We used the B3LYP functional and 6-31G(d) basis (Grimme dispersion corrections, GD3BJ) to optimize the model of pollutants. Then, the singlet point energy calculations were based on the B3LYP functional and a larger 6-311G(d) basis. The Hirshfeld atomic charges, HOMO/LUMO gap, ESP and Fukui functions were achieved with the help of the Multiwfn program<sup>2, 3</sup>. Fukui function has been widely used to predict reactive sites of electrophilic, nucleophilic, and radical attacking<sup>4</sup>.

## 2. Table

**Table S1.** Specific surface area ( $S_{\text{BET}}$ ), pore size ( $d$ ) and pore volume ( $V_t$ ) of the samples.

| sample                    | Structural parameters                 |                |                             |
|---------------------------|---------------------------------------|----------------|-----------------------------|
|                           | $S_{\text{BET}}(\text{m}^2/\text{g})$ | $d(\text{nm})$ | $V_t(\text{cm}^3/\text{g})$ |
| $\beta$ -zeolite          | 63.2                                  | 27.99          | 0.41                        |
| $\text{Cu}^0@ \text{CuZ}$ | 133.9                                 | 14.81          | 0.48                        |

**Table S2** The Cu content of  $\text{Cu}^0@ \text{CuZ-P}$  and  $\text{Cu}^0@ \text{CuZ}$ .

| Catalyst                                       | $\text{Cu}^0$ content (%) | $\text{Cu}^+$ content (%) | $\text{Cu}^{2+}$ content (%) |
|------------------------------------------------|---------------------------|---------------------------|------------------------------|
| $\text{Cu}^0@ \text{CuZ-p}$                    | 33                        | 29.8                      | 37.2                         |
| $\text{Cu}^0@ \text{CuZ}$                      | 42                        | 24                        | 34                           |
| $\text{Cu}^0@ \text{CuZ-p}$ after illumination | 33.7                      | 29.6                      | 36.7                         |
| $\text{Cu}^0@ \text{CuZ}$ after illumination   | 41.1                      | 29.5                      | 29.4                         |

**Table S3.** Degradation conditions and pollutants removal efficiency over Cu<sup>0</sup>@CuZ and other catalysts.

| target pollutants | catalysts                                                     | reaction conditions                                                                                       | catalytic performance                                      | references |
|-------------------|---------------------------------------------------------------|-----------------------------------------------------------------------------------------------------------|------------------------------------------------------------|------------|
| phenol            | FeOOH/Bi <sub>2</sub> MoO <sub>6</sub>                        | pH: 3.0; catalyst: 1.0 g/L; [H <sub>2</sub> O <sub>2</sub> ]: 20 mM; C <sub>0</sub> : 5 mg/L; T: 25 °C    | 100% removal in 3 h, $k = 1.13876 \text{ h}^{-1}$          | 5          |
| phenol            | Fe <sub>3</sub> O <sub>4</sub> -GO                            | pH: 5.0; catalyst: 0.25 g/L; [H <sub>2</sub> O <sub>2</sub> ]: 10 mM; C <sub>0</sub> : 20 mg/L; T: 25 °C  | 100% removal after 120 min, $k = -$                        | 6          |
| phenol            | FeOOH quantum dots coupled to g-C <sub>3</sub> N <sub>4</sub> | pH: 5.0; catalyst: 4 g/L; [H <sub>2</sub> O <sub>2</sub> ]: 20 mM; C <sub>0</sub> : 50 mg/L; T: 25 °C     | 100% removal after 90 min, $k = 0.054 \text{ min}^{-1}$    | 7          |
| phenol            | Cu-iminodisuccinic acid complex                               | pH: 7.0; catalyst: 0.02 mM; [H <sub>2</sub> O <sub>2</sub> ]: 14.7 mM; C <sub>0</sub> : 50 mg/L; T: 25 °C | 95% removal after 60 min, $k = -$                          | 8          |
| phenol            | AG/Fe <sub>3</sub> O <sub>4</sub>                             | pH: 7.0; catalyst: 0.5 mg/L; [H <sub>2</sub> O <sub>2</sub> ]: 250 mM; C <sub>0</sub> : 40 mg/L; T: 25 °C | 100% removal after 120 min, $k = 0.02083 \text{ min}^{-1}$ | 9          |
| 4-CP              | La <sub>1-x</sub> Ti <sub>x</sub> FeO <sub>3</sub>            | pH: 3.0; catalyst: 0.5 g/L; [H <sub>2</sub> O <sub>2</sub> ]: 3.7 mM; C <sub>0</sub> : 25 mg/L; T: 25 °C  | 100% removal in 200 min, $k = 0.0025 \text{ min}^{-1}$     | 10         |
| MB                | MA-Cu-Fe@C                                                    | pH: 5; catalyst: 0.5 g/L; [H <sub>2</sub> O <sub>2</sub> ]: 32 mM; C <sub>0</sub> : 50 mg/L; T: 25 °C     | 98.8% removal after 80 min, $k = 0.054 \text{ min}^{-1}$   | 11         |
| RhB               | Zn/Co-ZIFs@MIL-101(Fe)                                        | pH: 5; catalyst: 0.2 g/L; [H <sub>2</sub> O <sub>2</sub> ]: 90 mM; C <sub>0</sub> : 100 mg/L; T: 25 °C    | 98% removal after 3 h, $k = 1.33 \text{ h}^{-1}$           | 12         |
| TC                | CuFeO QDs/CNNSs                                               | pH: 6; catalyst: 0.5 g/L; [H <sub>2</sub> O <sub>2</sub> ]: 100 mM; C <sub>0</sub> : 50 mg/L; T: 25 °C    | 100% removal in 25 min, $k = -$                            | 13         |
| phenol/MB         |                                                               | pH: 4.0; catalyst: 0.2 g/L; [H <sub>2</sub> O <sub>2</sub> ]: 10.0 mM; C <sub>0</sub> : 20 mg/L; T: 25 °C | 100% removal in 20 min, $k = 0.387 \text{ min}^{-1}$       | this work  |

### 3. Figures

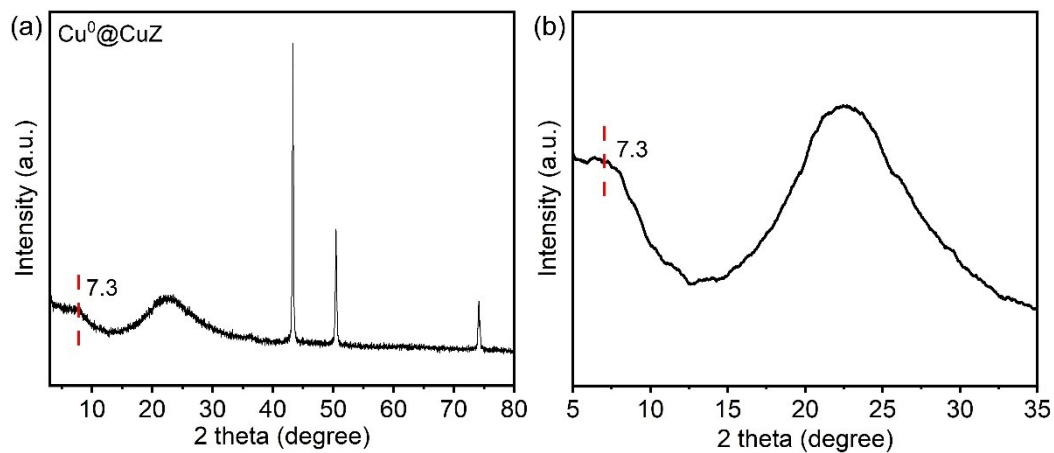

**Fig. S1** (a) XRD pattern of  $\text{Cu}^0@CuZ$ . (b) Enlarged view of the XRD pattern of  $\text{Cu}^0@CuZ$ .

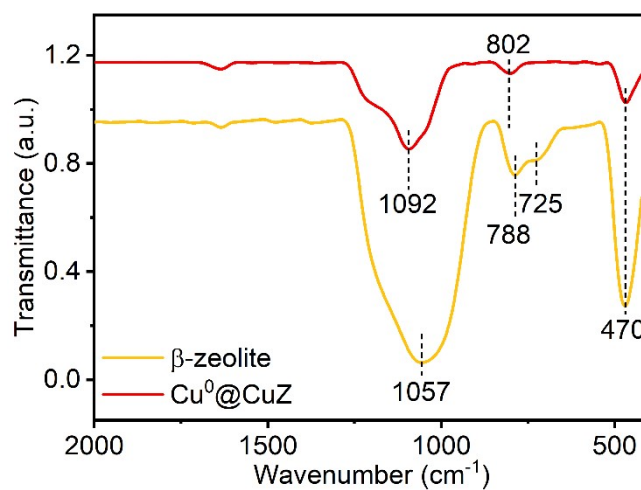

**Fig. S2** FTIR spectra of samples.

The FTIR spectrum showed that bands around 470, 725, 788, 1057  $\text{cm}^{-1}$  were characterized to  $\beta$ -zeolite. By contrast, an additional band at approximately 1092  $\text{cm}^{-1}$  was assigned to Si-O-Cu bond compared with  $\beta$ -zeolite<sup>14-16</sup>.

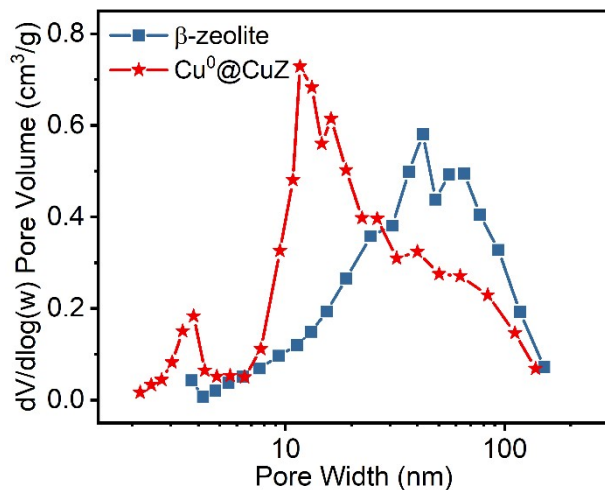

**Fig. S3** Pore size distribution of  $\text{Cu}^0\text{@CuZ}$  and  $\beta$ -zeolite.

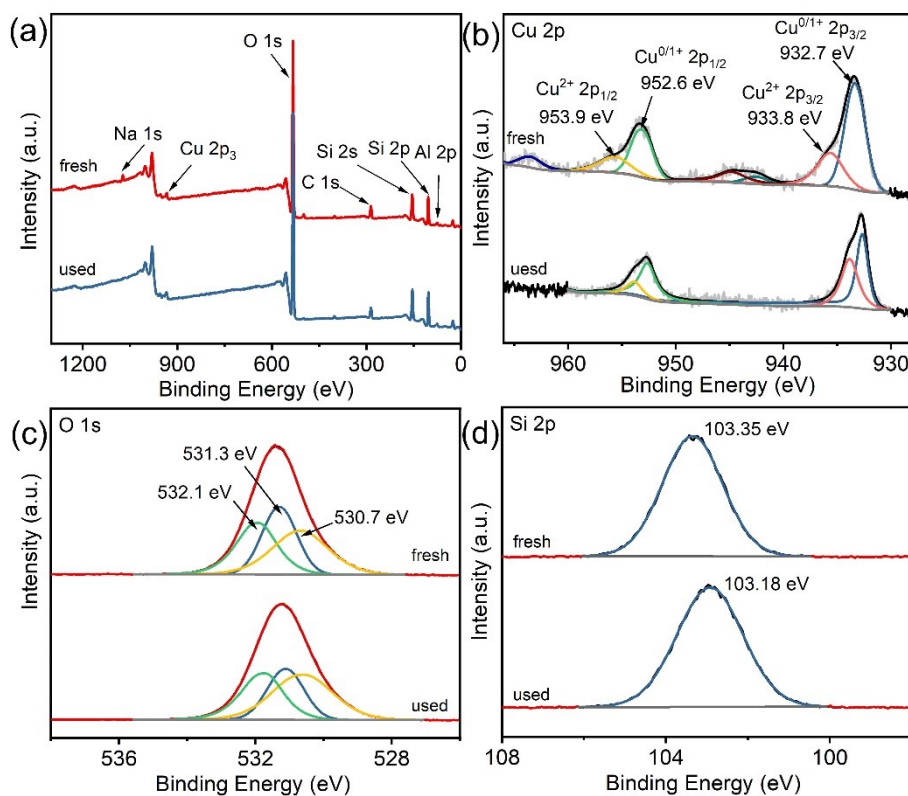

**Fig. S4** (a) Wide scan XPS spectrum of  $\text{Cu}^0\text{@CuZ}$ . High-resolution XPS spectra of (b) Cu 2p, (c) O 1s and (d) Si 2p for  $\text{Cu}^0\text{@CuZ}$ .

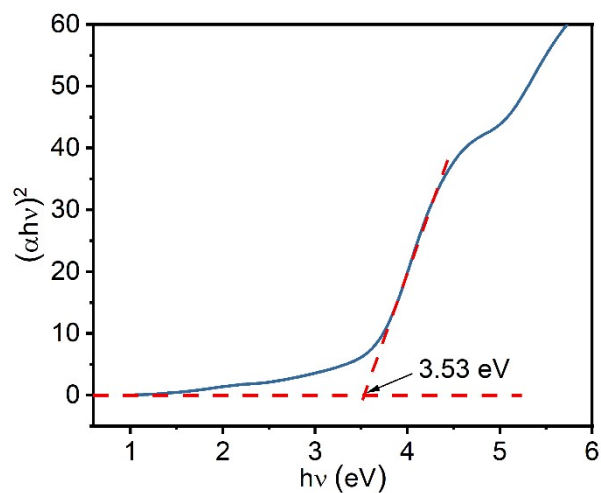

**Fig. S5** Band gap values of  $\text{Cu}^0\text{@CuZ-p}$ .

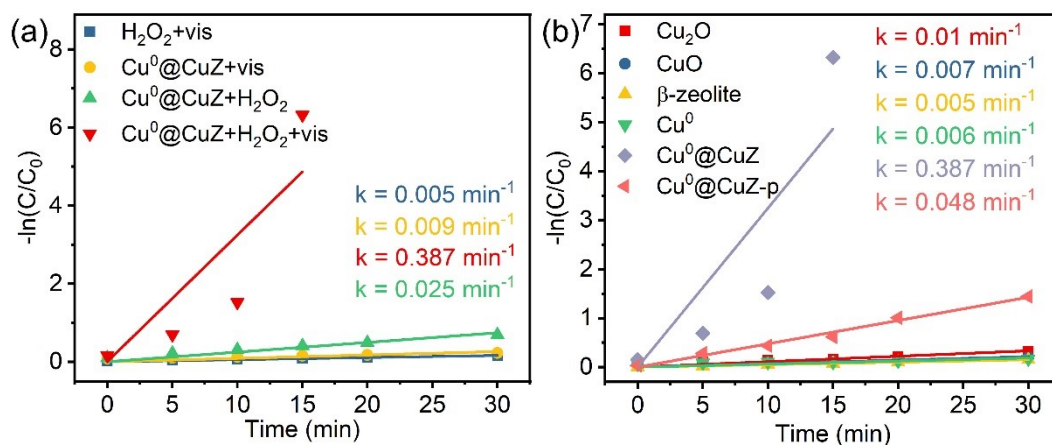

**Fig. S6** (a)  $k$  values of various reaction systems. (b)  $k$  values over different catalysts in the photo-Fenton-like system.



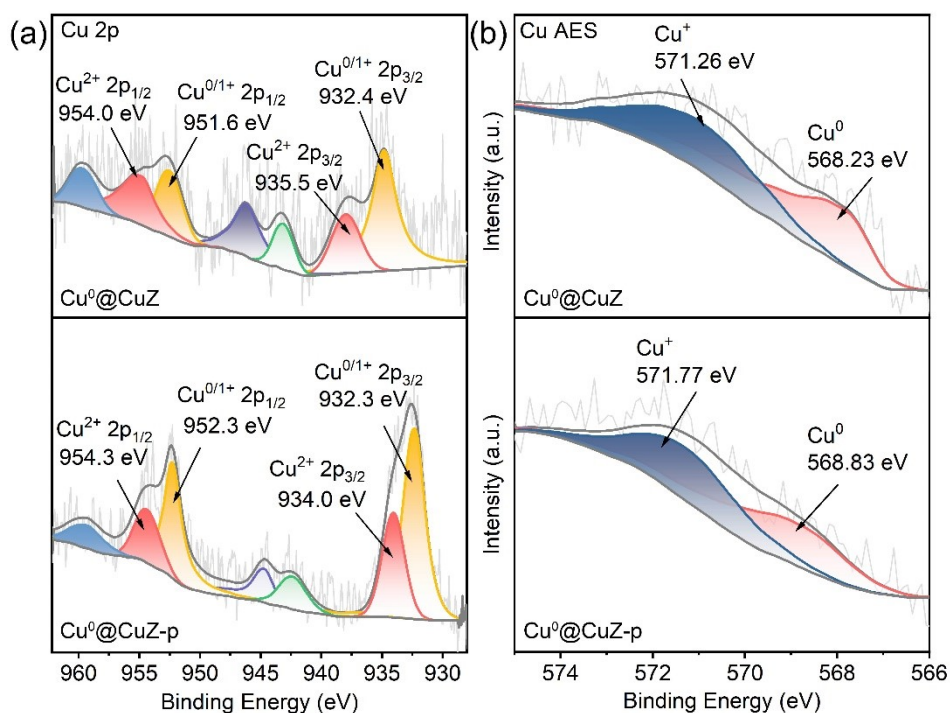

**Fig. S7** The high-resolution XPS of Cu 2p and Cu AES spectrum of  $\text{Cu}^0@CuZ$  and  $\text{Cu}^0@CuZ-p$  after 30 min illumination.

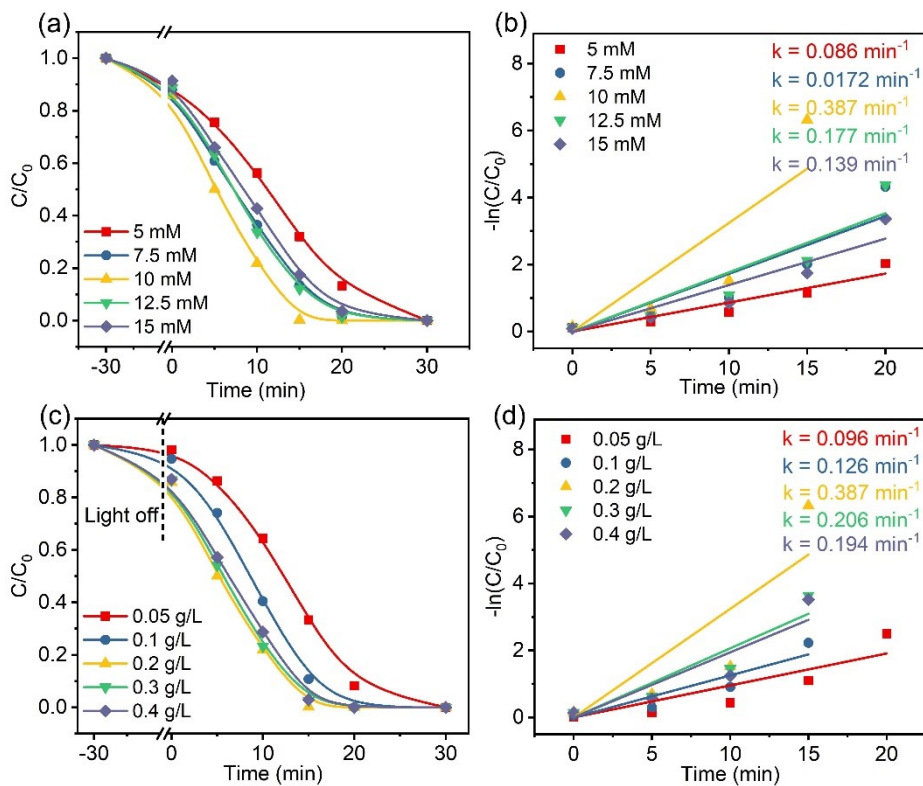

**Fig. S8** Effects of (a)  $\text{H}_2\text{O}_2$  concentration and (b) corresponding  $k$  value on phenol removal over  $\text{Cu}^0@CuZ$ . (c) catalyst dosage and (d) corresponding  $k$  value on phenol removal over  $\text{Cu}^0@CuZ$ .

As depicted in Figs. S6a-b, the phenol removal efficiency increased from 87% to 100% when  $\text{H}_2\text{O}_2$  concentration raised from 5 to 10 mM, and the  $k$  value of  $\text{Cu}^0@\text{CuZ}$  markedly increased from 0.086 to 0.387  $\text{min}^{-1}$ , which was due to the increasing concentration of  $\text{H}_2\text{O}_2$  can produce more  $\bullet\text{OH}$  for phenol removal. However, both the removal efficiency and the  $k$  value decreased as the  $\text{H}_2\text{O}_2$  concentration further increased to 15 mM, which is due to the fact that the excessive  $\text{H}_2\text{O}_2$  could be a scavenger for  $\bullet\text{OH}$  (An 2023). Therefore, 10 mM  $\text{H}_2\text{O}_2$  was selected as the optimum reaction parameters. The catalyst dosage influence on phenol removal efficiency was exhibited in Figs. S6c-d. When the  $\text{Cu}^0@\text{CuZ}$  dosage was greater than 0.1 g/L, 100% phenol removal efficiency was achieved. Notably, the  $k$  value increased from 0.096 to 0.387  $\text{min}^{-1}$  with an increase in catalyst dosage from 0.05 to 0.2 g/L, which is owing to that the higher catalyst dosage produces the more  $\text{H}_2\text{O}_2$  activation sites to generate more  $\bullet\text{OH}$ , leading to the good phenol removal efficiency. Nevertheless, with further increasing of  $\text{Cu}^0@\text{CuZ}$  dosage from 0.2 to 0.4 g/L led the  $k$  value decreased. This is mainly attributed to that the superfluous catalysts could reduce the solution transmittance, resulting in light scattering, and the sum total of photons eventually reaching the surface of catalyst would be reduced.

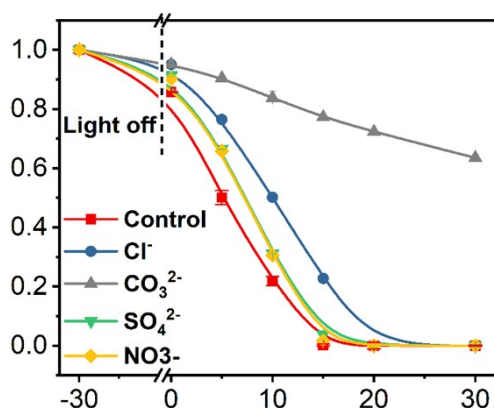

**Fig. S9** Effects of coexisting anions on phenol removal efficiency over  $\text{Cu}^0@\text{CuZ}$ .

The addition of  $\text{CO}_3^{2-}$  inhibited the phenol removal efficiency by 63%. The reasons for the decrease are as follows:  $\text{CO}_3^{2-}$ , as trapping agent for  $\bullet\text{OH}$ , would react with  $\bullet\text{OH}$  to generate  $\bullet\text{CO}_3^-$  with weak oxidation ability;  $\text{CO}_3^{2-}$  in the water bodies can easily form  $\text{HCO}_3^-$ ,  $\text{OH}^-$ , and  $\text{H}_2\text{CO}_3$ , leading to an increase in reaction system pH value (Eqs. 1–3), and the catalytic activity of the  $\text{Cu}^0@\text{CuZ}$  would be hindered.

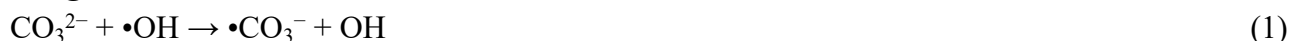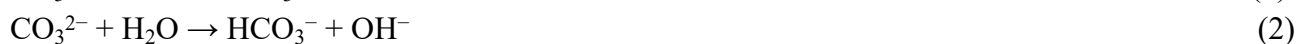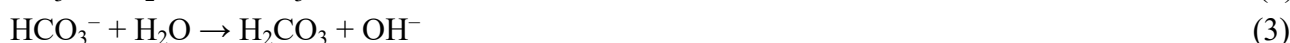

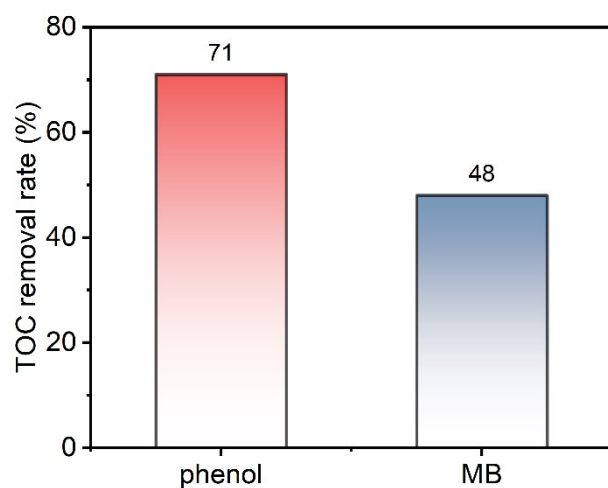

**Fig. S10** The TOC removal rate of phenol and MB over  $\text{Cu}^0\text{@CuZ}$  in photo-Fenton-like system within 90 min.

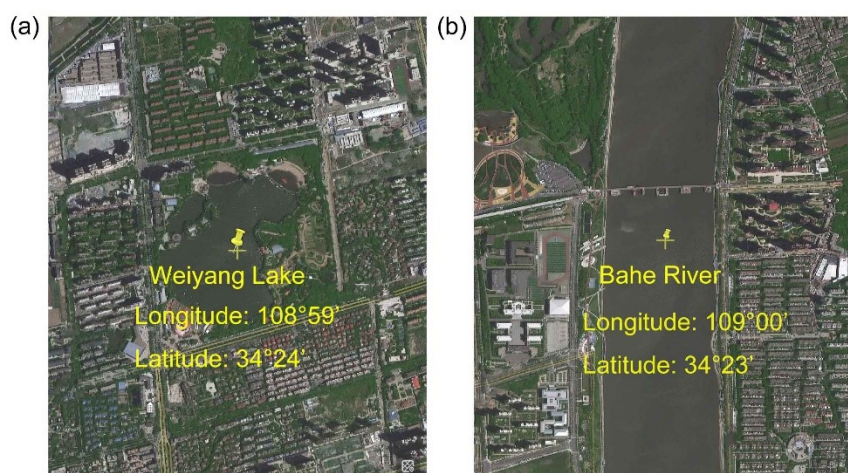

**Fig. S11** (a) Lake water and (b) river water intake point.

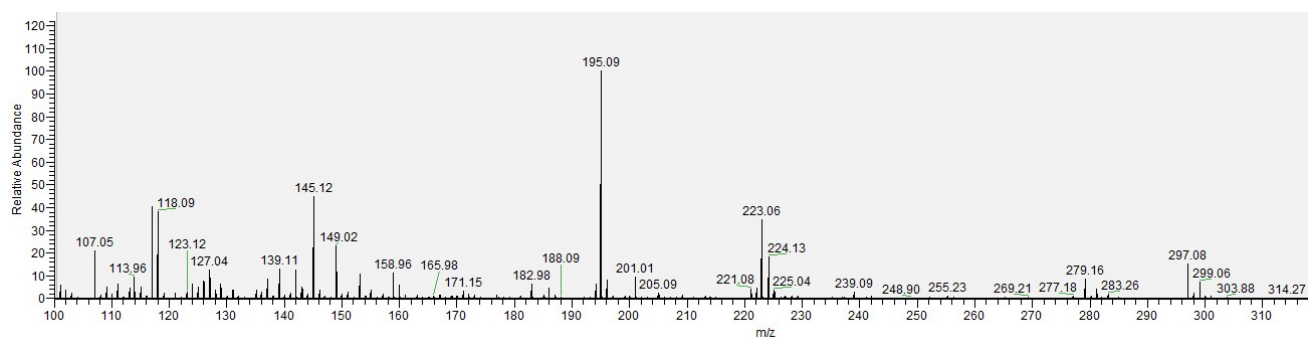

**Fig. S12** Mass spectrum peak obtained from the DCF degradation over  $\text{Cu}^0/\text{CuZ}$  after 10 min irradiation.

## References

1. M. Frisch, G. Trucks, H. Schlegel, G. Scuseria, M. Robb, J. Cheeseman, G. Scalmani, V. Barone, G. Petersson and H. Nakatsuji, Gaussian, Inc., Wallingford CT, 2016, *Gaussian09, Revision D*, 2016, **1**.
2. T. Lu and F. Chen, Multiwfn: a multifunctional wavefunction analyzer, *J. Comput. Chem.*, 2012, **33**, 580-592.
3. T. Lu and Q. Chen, in *Conceptual Density Functional Theory*, 2022, DOI: 10.1002/9783527829941.ch31, pp. 631-647.
4. R. G. Parr and W. T. Yang, Density Functional-Approach to the Frontier-Electron Theory of Chemical-Reactivity, *J. Am. Chem. Soc.*, 1984, **106**, 4049-4050.
5. J. Hu, J. Li, J. Cui, W. An, L. Liu, Y. Liang and W. Cui, Surface oxygen vacancies enriched FeOOH/Bi<sub>2</sub>MoO<sub>6</sub> photocatalysis-Fenton synergy degradation of organic pollutants, *J. Hazard. Mater.*, 2020, **384**, 121399.
6. L. Yu, J. Chen, Z. Liang, W. Xu, L. Chen and D. Ye, Degradation of phenol using Fe<sub>3</sub>O<sub>4</sub>-GO nanocomposite as a heterogeneous photo-Fenton catalyst, *Sep. Purif. Technol.*, 2016, **171**, 80-87.
7. X. Qian, Y. Wu, M. Kan, M. Fang, D. Yue, J. Zeng and Y. Zhao, FeOOH quantum dots coupled g-C<sub>3</sub>N<sub>4</sub> for visible light driving photo-Fenton degradation of organic pollutants, *Appl. Catal. B*, 2018, **237**, 513-520.
8. A. Fiorentino, R. Cucciniello, A. Di Cesare, D. Fontaneto, P. Prete, L. Rizzo, G. Corno and A. Proto, Disinfection of urban wastewater by a new photo-Fenton like process using Cu-iminodisuccinic acid complex as catalyst at neutral pH, *Water Res.*, 2018, **146**, 206-215.
9. P. K. Boruah, B. Sharma, I. Karbhal, M. V. Shelke and M. R. Das, Ammonia-modified graphene sheets decorated with magnetic Fe<sub>3</sub>O<sub>4</sub> nanoparticles for the photocatalytic and photo-Fenton degradation of phenolic compounds under sunlight irradiation, *J. Hazard. Mater.*, 2017, **325**, 90-100.
10. P. Garcia-Muñoz, F. Fresno, C. Lefevre, D. Robert and N. Keller, Highly robust La<sub>1-x</sub>Ti<sub>x</sub>FeO<sub>3</sub> dual catalyst with combined photocatalytic and photo-CWPO activity under visible light for 4-chlorophenol removal in water, *Appl. Catal. B*, 2020, **262**, 118310.
11. Z. Zhao, X. Cai, S. Fan, Y. Zhang, Z. Huang, H. Hu, J. Liang and Y. Qin, Construction of a stable Cu-Fe@C composite catalyst with enhanced performance and recyclability for visible-light-driven photo-Fenton reaction, *J. Alloys Compd.*, 2021, **877**, 160260.
12. Y. Li, X. Wang, Z. Duan, D. Yu, Q. Wang, D. Ji and W. Liu, Zn/Co-ZIFs@MIL-101(Fe) metal-organic frameworks are effective photo-Fenton catalysts for RhB removal, *Sep. Purif. Technol.*, 2022, **293**, 121099.
13. M. Liu, H. Xia, W. Yang, X. Liu, J. Xiang, X. Wang, L. Hu and F. Lu, Novel Cu-Fe Bi-metal oxide quantum dots coupled g-C<sub>3</sub>N<sub>4</sub> nanosheets with H<sub>2</sub>O<sub>2</sub> adsorption-activation trade-off for efficient photo-Fenton catalysis, *Appl. Catal. B*, 2022, **301**, 120765.
14. A. Corma, V. Fornes, S. B. Pergher, T. L. M. Maesen and J. G. Buglass, Delaminated zeolite precursors as selective acidic catalysts, *Nature*, 1998, **396**, 353-356.

15. H.-K. Min, S. Kweon, S. Oh, H. An, Y. Cho, H. Min, D. Jo, J. F. Kim, C.-H. Shin, S. B. Kang and M. B. Park, Single-step preparation of zinco- and aluminosilicate delaminated MWW layers for the catalytic conversion of glucose, *Green Chem.*, 2021, **23**, 9489-9501.
16. L. Singh, P. Rekha and S. Chand, Cu-impregnated zeolite Y as highly active and stable heterogeneous Fenton-like catalyst for degradation of Congo red dye, *Sep. Purif. Technol.*, 2016, **170**, 321-336.
